# Supplementary material for: The orthotropic viscoelastic characterisation of sub-zero 3D-printed poly(vinyl alcohol) cryogel
Source: PubMed Central journal article supplement (PMC8550303; doi:10.1557/s43580-021-00086-1), 2021-06-22
Supplement: 43580_2021_86_MOESM1_ESM.pdf [file 43580_2021_86_MOESM1_ESM.pdf]

## Supplementary Data

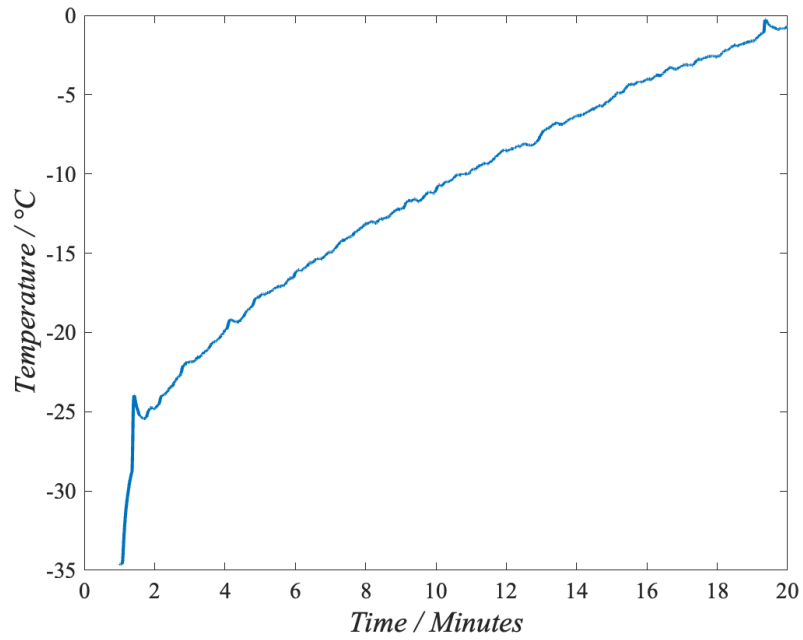

Figure 1: Temperature profile of the steel print bed during the first 20 minutes upon removal from the freezer. Samples were manufactured within the first 5 minutes of removal from the freezer.

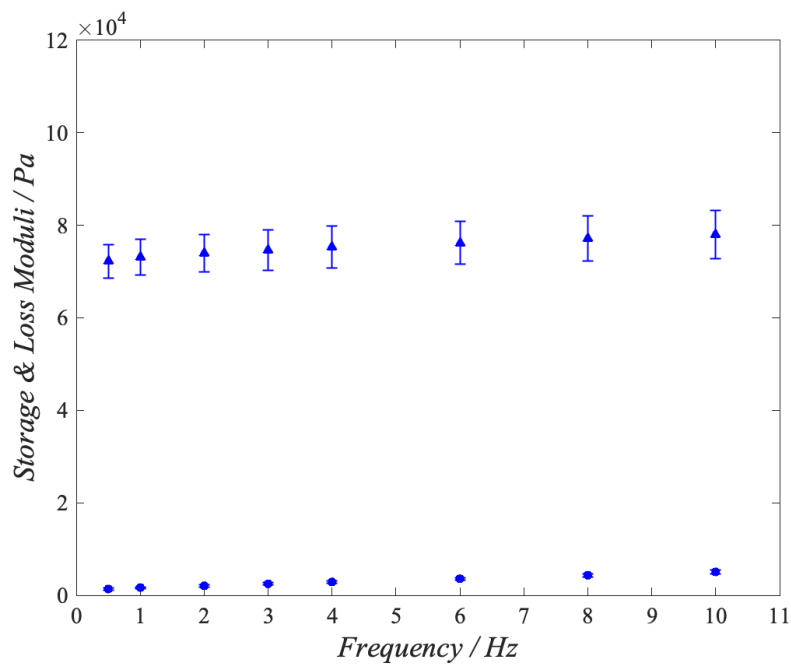

Figure 2: Storage (triangles) and loss (circles) moduli for cast control samples. Error bars show 95% confidence intervals.

| Freq (Hz) | Perpendicular |      | Parallel |      |
|-----------|---------------|------|----------|------|
|           | E' (Pa)       | SD   | E' (Pa)  | SD   |
| 0.5       | 59300         | 5490 | 92400    | 7380 |
| 1         | 59200         | 5420 | 93000    | 7240 |
| 2         | 59700         | 5470 | 93900    | 7230 |
| 3         | 59900         | 5420 | 94400    | 7190 |
| 4         | 60200         | 5460 | 94900    | 7090 |
| 6         | 60400         | 5580 | 95200    | 6920 |
| 8         | 60800         | 5660 | 95900    | 6900 |
| 10        | 61300         | 5670 | 96800    | 6950 |
|           | E'' (Pa)      | SD   | E'' (Pa) | SD   |
| 0.5       | 2150          | 164  | 3260     | 564  |
| 1         | 2450          | 187  | 3650     | 423  |
| 2         | 3170          | 214  | 4540     | 416  |
| 3         | 3830          | 253  | 5350     | 434  |
| 4         | 4520          | 291  | 6220     | 441  |
| 6         | 5620          | 377  | 7650     | 459  |
| 8         | 6690          | 439  | 9080     | 528  |
| 10        | 7580          | 451  | 10200    | 600  |

Table 1: Mean Values and Standard Deviation for storage and loss moduli of additively manufactured samples of PVA using a 25G nozzle. (N = 6)

| Freq (Hz) | Perpendicular |      | Parallel |      |
|-----------|---------------|------|----------|------|
|           | E' (Pa)       | SD   | E' (Pa)  | SD   |
| 0.5       | 67000         | 5240 | 77300    | 4640 |
| 1         | 67000         | 5240 | 77500    | 4640 |
| 2         | 67400         | 5280 | 78000    | 4620 |
| 3         | 67600         | 5340 | 78300    | 4700 |
| 4         | 67700         | 5380 | 78500    | 4680 |
| 6         | 68000         | 5380 | 78900    | 4670 |
| 8         | 68200         | 5430 | 79100    | 4700 |
| 10        | 68300         | 5490 | 79100    | 4680 |
|           | E'' (Pa)      | SD   | E'' (Pa) | SD   |
| 0.5       | 1570          | 114  | 1870     | 213  |
| 1         | 1850          | 154  | 2200     | 157  |
| 2         | 2430          | 185  | 2840     | 179  |
| 3         | 3020          | 203  | 3460     | 165  |
| 4         | 3550          | 250  | 4010     | 178  |
| 6         | 4620          | 302  | 5150     | 235  |
| 8         | 5480          | 341  | 6180     | 247  |
| 10        | 6310          | 374  | 7090     | 269  |

Table 2: Mean Values and Standard Deviation for storage and loss moduli of additively manufactured samples of PVA using a 22G nozzle. (N = 6)

|           | Perpendicular |      | Parallel |      |
|-----------|---------------|------|----------|------|
| Freq (Hz) | E' (Pa)       | SD   | E' (Pa)  | SD   |
| 0.5       | 77100         | 2130 | 79300    | 4330 |
| 1         | 77000         | 1950 | 79200    | 4250 |
| 2         | 77400         | 1880 | 79600    | 4160 |
| 3         | 77700         | 1820 | 80000    | 4240 |
| 4         | 78000         | 1860 | 80400    | 4260 |
| 6         | 78300         | 1820 | 80700    | 4280 |
| 8         | 78500         | 1810 | 81000    | 4220 |
| 10        | 78700         | 1810 | 81300    | 4220 |
|           | E'' (Pa)      | SD   | E'' (Pa) | SD   |
| 0.5       | 1550          | 225  | 1800     | 420  |
| 1         | 1930          | 61.4 | 1960     | 171  |
| 2         | 2590          | 70.3 | 2580     | 295  |
| 3         | 3190          | 81.3 | 3340     | 201  |
| 4         | 3890          | 88.8 | 4020     | 248  |
| 6         | 5030          | 119  | 5150     | 286  |
| 8         | 6060          | 180  | 6210     | 368  |
| 10        | 7000          | 158  | 7180     | 375  |

Table 3: Mean Values and Standard Deviation for storage and loss moduli of additively manufactured samples of PVA using a 18G nozzle. (N = 6)

| Freq | E' (Pa) | SD   | E'' (Pa) | SD  |
|------|---------|------|----------|-----|
| 0.5  | 72300   | 2930 | 1360     | 155 |
| 1    | 73100   | 3120 | 1670     | 145 |
| 2    | 74000   | 3250 | 2060     | 179 |
| 3    | 74600   | 3500 | 2460     | 194 |
| 4    | 75300   | 3660 | 2890     | 232 |
| 6    | 76200   | 3720 | 3590     | 221 |
| 8    | 77100   | 3940 | 4340     | 288 |
| 10   | 78000   | 4160 | 5070     | 352 |

Table 4: Mean Values and Standard Deviation for storage and loss moduli of cast control samples of PVA. (N = 6)

| Freq    | 0.51 mm |      | 0.71 mm |      | 1.28 mm |        |
|---------|---------|------|---------|------|---------|--------|
|         | E'      | E''  | E'      | E''  | E'      | E''    |
| 0.1     | 35.8    | 34.2 | 13.2    | 16.1 | 2.8     | 13.8   |
| 1       | 36.4    | 32.8 | 13.5    | 16.2 | 2.78    | 1.51   |
| 2       | 36.5    | 30.3 | 13.6    | 14.4 | 2.77    | -0.538 |
| 3       | 36.6    | 28.4 | 13.6    | 12.8 | 2.93    | 4.59   |
| 4       | 36.6    | 27.3 | 13.8    | 11.4 | 2.98    | 3.23   |
| 6       | 36.5    | 26.5 | 13.8    | 10.4 | 3.02    | 2.4    |
| 8       | 36.6    | 26.3 | 13.8    | 11.3 | 3.1     | 2.42   |
| 10      | 36.7    | 25.6 | 13.7    | 11   | 3.21    | 2.57   |
| Average | 36.4    | 28.9 | 13.6    | 12.9 | 2.95    | 3.75   |
| SD      | 0.255   | 2.96 | 0.181   | 2.17 | 0.148   | 4.04   |

Table 5: Average increase in storage and loss moduli when comparing additively manufactured samples of PVA tested in perpendicular and parallel orientations for three nozzle sizes. (N = 6)

| Freq (Hz) | 25G (small) |          | 22G (medium) |          | 18G (large) |          |
|-----------|-------------|----------|--------------|----------|-------------|----------|
|           | E' (Pa)     | E'' (Pa) | E' (Pa)      | E'' (Pa) | E' (Pa)     | E'' (Pa) |
| 0.5       | 1.10E-05    | 0.0017   | 0.0085       | 0.019    | 0.33        | 0.27     |
| 1         | 7.90E-06    | 0.00018  | 0.0074       | 0.0046   | 0.32        | 0.72     |
| 2         | 7.30E-06    | 6.20E-05 | 0.0069       | 0.0053   | 0.3         | 0.92     |
| 3         | 6.40E-06    | 4.90E-05 | 0.0073       | 0.0035   | 0.28        | 0.15     |
| 4         | 5.80E-06    | 2.90E-05 | 0.0068       | 0.0076   | 0.28        | 0.3      |
| 6         | 5.30E-06    | 1.80E-05 | 0.0066       | 0.011    | 0.27        | 0.39     |
| 8         | 5.10E-06    | 1.50E-05 | 0.0069       | 0.0041   | 0.25        | 0.43     |
| 10        | 4.80E-06    | 1.50E-05 | 0.0072       | 0.0037   | 0.23        | 0.33     |
| Average   | 6.70E-06    | 2.60E-04 | 7.20E-03     | 7.30E-03 | 2.80E-01    | 4.40E-01 |
| SD        | 1.90E-06    | 5.20E-04 | 5.30E-04     | 4.70E-03 | 2.90E-02    | 2.30E-01 |

Table 6: P-values for unpaired t-tests comparing storage and loss moduli tested in perpendicular and parallel orientations for 3 nozzle sizes.
